# Supplementary material for: Synthetic polymeric nanoparticles by nanoprecipitation
Source: Royal Society of Chemistry journal article supplement (doi:10.1039/b906556n), 2009-01-01
Supplement: b906556n.pdf [file b906556n.pdf]

## Synthetic Polymeric Nanoparticles by Nanoprecipitation

Stephanie Hornig, Thomas Heinze,\* C. Remzi Becer, Ulrich S. Schubert\*

thomas.heinze@uni-jena.de; ulrich.schubert@uni-jena.de

### Supporting Information

#### Materials and Methods

##### *Materials*

Styrene and anisole were bought from Aldrich and purified over a neutral alumina oxide column prior to use. Chloroform and methanol were obtained from Biosolve, Ltd. and were used without further purification. MAMA as an SG-1 based alkoxyamine initiator and *N,N*-*tert*-butyl-*N*-[1'-diethylphosphono-2-2'-dimethylpropyl] nitroxide (SG-1) as a free nitroxide were purchased from Arkema and used as received. Azobis(isobutyronitrile) (AIBN, Aldrich) was recrystallized from methanol. 2-Cyano-2-butyl dithiobenzoate (CBDB, chain transfer agent) was kindly provided by AGFA. CuBr (99.999%, Aldrich), Cu(II)Br (99.999%, Aldrich), ethyl 2-bromoisobutyrate (EBiB) (98%, Aldrich), PMDETA (99%, Aldrich), and MMA (99%, Aldrich) were used as received. Poly(styrene), poly(methyl methacrylate), poly( $\epsilon$ -caprolactone), poly(vinylcarbazole), poly(styrene-*co*-acrylic acid) and poly(ethylene) are technical samples. Purified *N,N*-dimethylacetamide (DMA) was purchased from VWR.

##### *Preparation of the poly(styrene) samples*

Polystyrene homopolymers were prepared by nitroxide mediated polymerization. The optimum polymerization conditions, e.g. polymerization temperature and concentration of free-nitroxide, were determined in previous studies.[1] It was reported that there is no significant effect of excess free-nitroxide on the control over the polymerization of styrene. However, the polymerization temperature has a critical importance for obtaining polymers with narrow polydispersity indices. Therefore, the reactions were performed at 110 °C (PS2, PS5, and PS6) or 120 °C (PS1, PS3, and PS4) without any additional free-nitroxide.

Different ratios of styrene to Bloc Builder were used, e.g. 50:1 (PS-1), 80:1 (PS-2), 100:1 (PS-3), 150:1 (PS-4), 160:1 (PS-5), and 240:1 (PS-6), to synthesize the poly(styrene) samples. Anisole was used as solvent in all NMP reactions. The polymerization of styrene was conducted at 110 °C for 15 h or at 120 °C for 6 h, respectively. Following the polymerization, the Schlenk tube was cooled down with water and the solution was diluted with THF. The polymer was purified by precipitation twice into methanol and dried in a vacuum oven overnight. The monomer conversion for all polymerizations were determined by GC and found to be around 70%. The molar masses and PDI values of the polymers were measured by SEC and the traces are depicted in Figure 1.

#### *Preparation of the poly(methyl methacrylate) samples*

Reversible addition-fragmentation chain transfer (RAFT) polymerization of methyl methacrylate (MMA) was performed in toluene using AIBN as initiator and CBDB as chain transfer agent. All chemicals were added into a schlenk tube and bubbled with Argon for 30 min. The reaction was conducted at 70 °C for 12 h. PMMA-1 was precipitated into methanol twice to remove the unreacted monomer and solvent.

PMMA-2 was prepared via atom transfer radical polymerization (ATRP) as reported previously.<sup>2</sup>

#### *Nanoparticle preparation by dialysis*

In general, the polymer sample (10 mg) was dissolved in 2.5 mL DMA and dialyzed against 400 mL of distilled water. The water was exchanged five times after at least 3 h of dialysis.

#### *Nanoparticle preparation by the dropping technique*

In general, 10 mg of the polymer sample was dissolved in 2.5 mL acetone. The solution was added dropwise to 10 mL distilled water. The resulting nanoparticle suspensions were stirred at 50 °C for 10 h until the acetone was completely removed from the aqueous suspension.

#### *Characterization of the polymers and nanoparticles*

GC measurements were performed on an Interscience Trace GC with a Trace Column RTX-5 connected to a PAL autosampler. For the injection of polymerization mixtures, a special Interscience liner with additional glass wool was used. GPC was measured on a Shimadzu system equipped with a SCL-10A system controller, a LC-10AD pump, a RID-10A refractive index detector and a PL gel 5 mm Mixed-D column utilizing a chloroform:triethylamine:isopropanol (94:4:2) mixture as eluent at a flow rate of 1 mL/min and column temperature of 50 °C. The

molar masses were calculated against polystyrene standards (from 3,420 g/mol to 246,000 g/mol).

The particle sizes and polydispersity indices of the nanoparticles ( $PDI_p$ ) were determined by dynamic light scattering (DLS) using a Zetasizer Nano ZS (Malvern Instruments, Malvern, UK). The suspensions were diluted with demineralized, filtered water to a concentration of about 0.005%. The mean particle size was approximated as the z-average diameter and the width of the distribution as the  $PDI_p$  obtained by the cumulants method assuming a spherical shape.[3] Each sample was measured for 7.5 min (corresponding to 3 runs over 150 s).

For scanning electron microscopy (SEM) studies, one droplet of the nanoparticle suspension was lyophilized on a mica surface and covered with gold. The images were obtained with a SEM LEO-1530 VP Gemini (LEO, Oberkochen, Germany) operating at 10 kV.

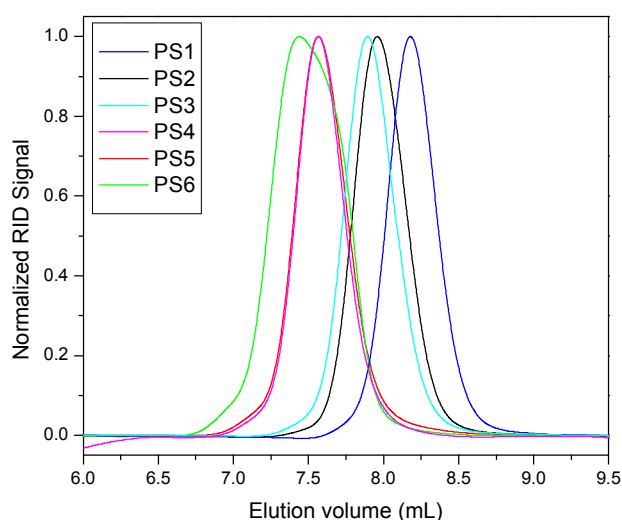

**Fig 1.** SEC traces of the polystyrene homopolymers.

## References

- [1] C. R. Becer, R. M. Paulus, R. Hoogenboom, U. S. Schubert *J. Polym. Sci. Part A: Polym. Chem.* **2006**, *44*, 6202-6213.
- [2] C. R. Becer, R. Hoogenboom, D. Fournier, U. S. Schubert *Macromol. Rapid. Commun.* **2007**, *28*, 1161-1166.
- [3] D. E. Koppel *J. Chem. Phys.* **1972**, *57*, 4814-4820.
